# Supplementary material for: A Novel Role of SMG1 in Cholesterol Homeostasis That Depends Partially on p53 Alternative Splicing
Source: MDPI journal article supplement (doi:10.3390/cancers14133255), 2022-07-02

# Original Western blots

Whole blots/strips captured in ChemiDoc Imaging Systems are shown,  
density of bands (relative to control band) annotated.

**Figure 2B.**

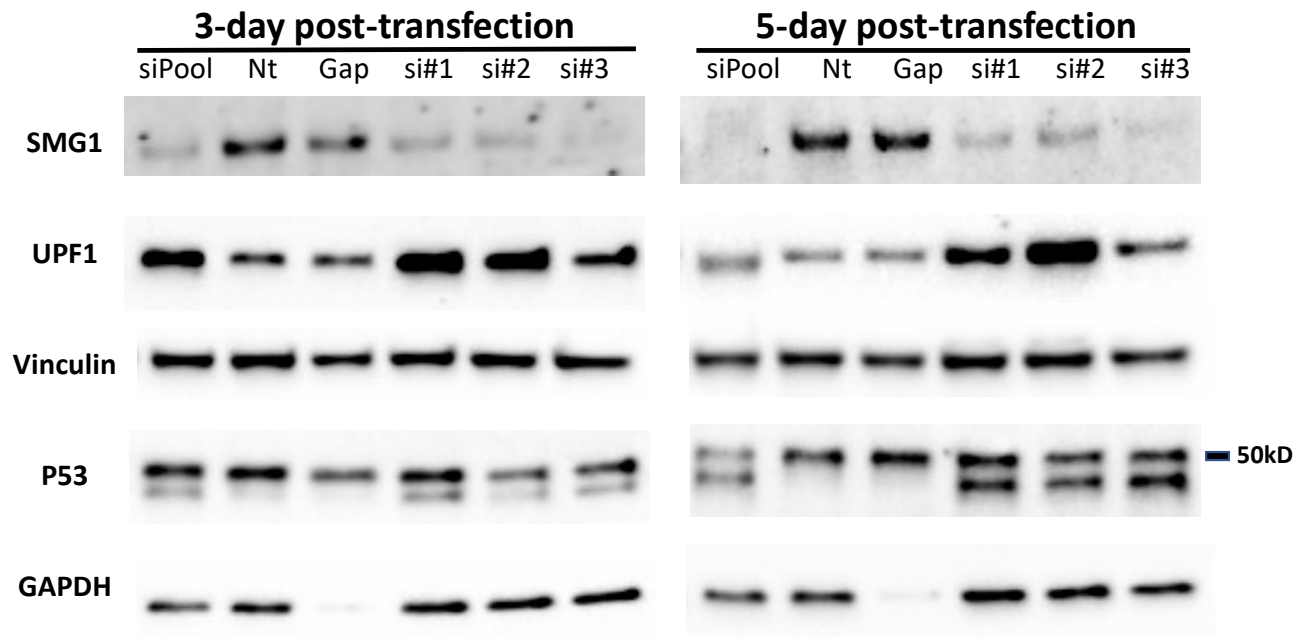

Unpublished data

### 3-day post-transfection

siPool Nt Gap si#1 si#2 si#3

460 -  
SMG1 410kD

0.37 1.00 0.70 0.30 0.24 0.21

268 -  
258 -

Unpublished data

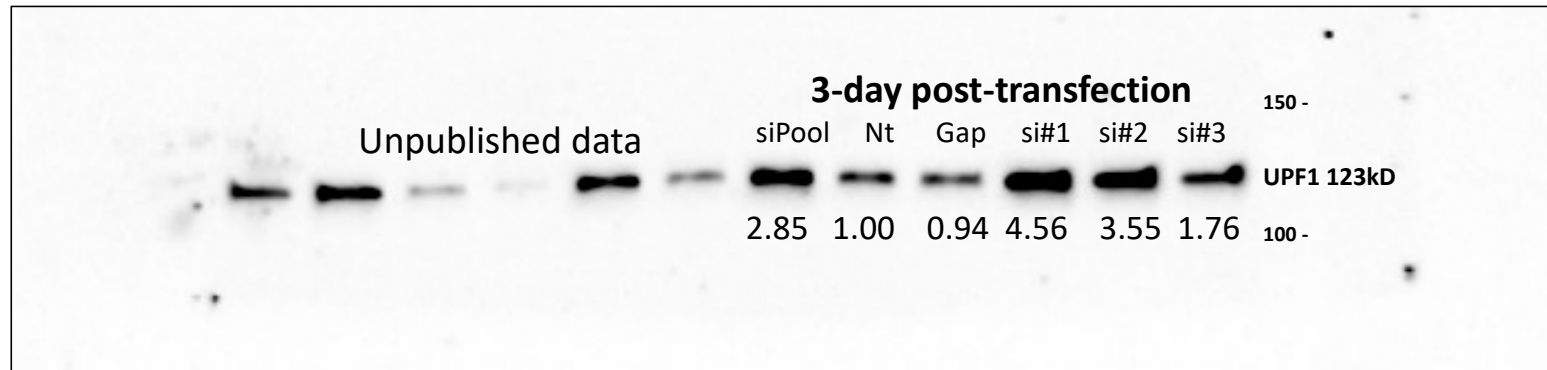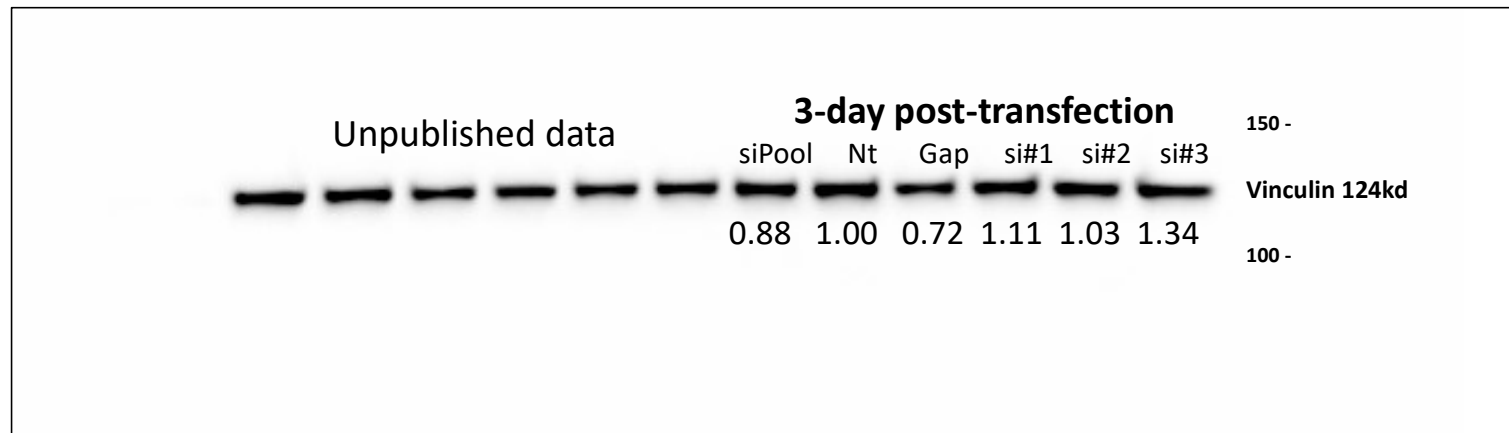

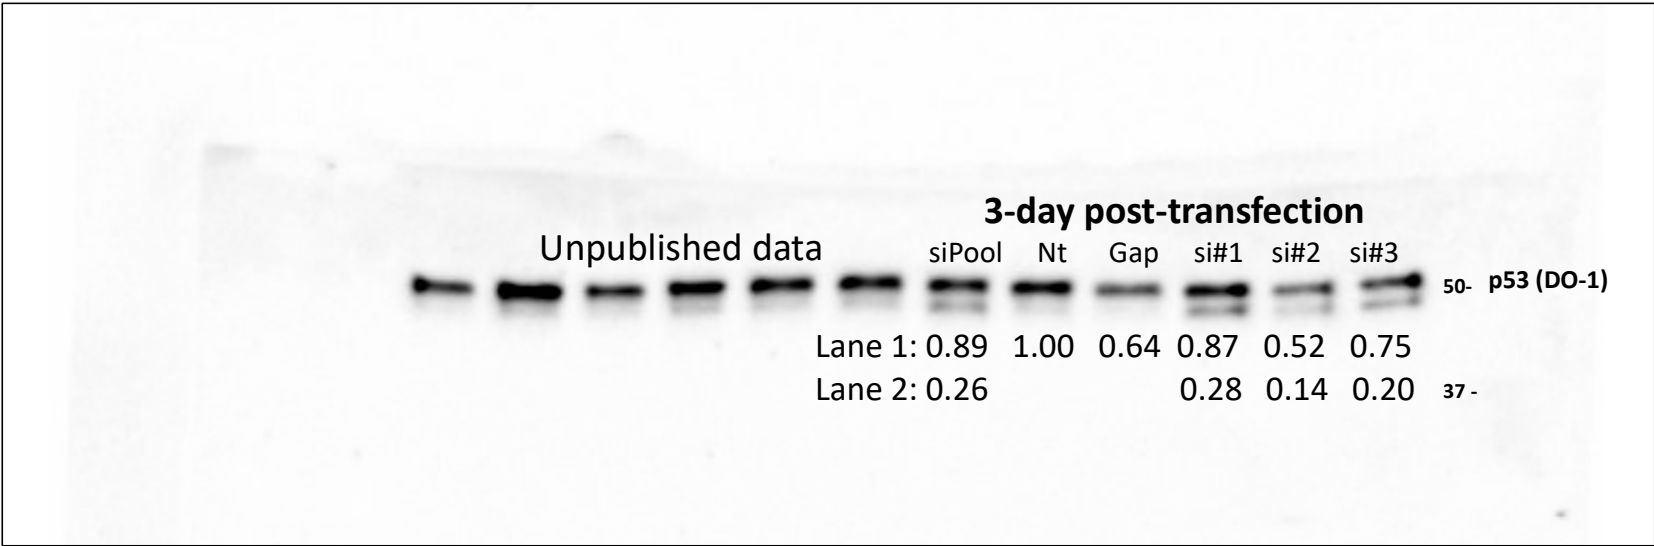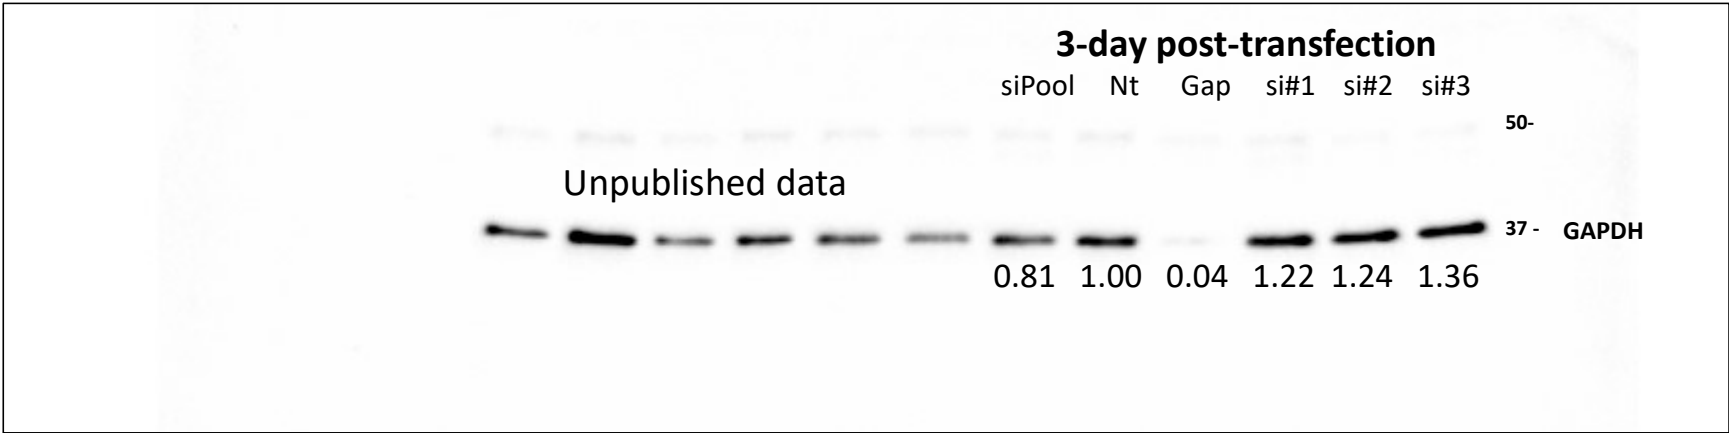

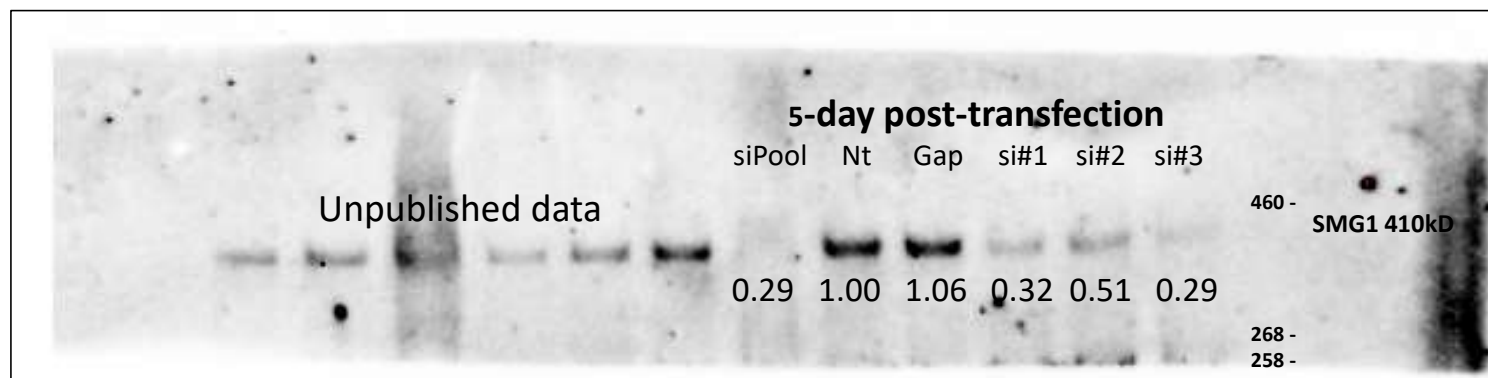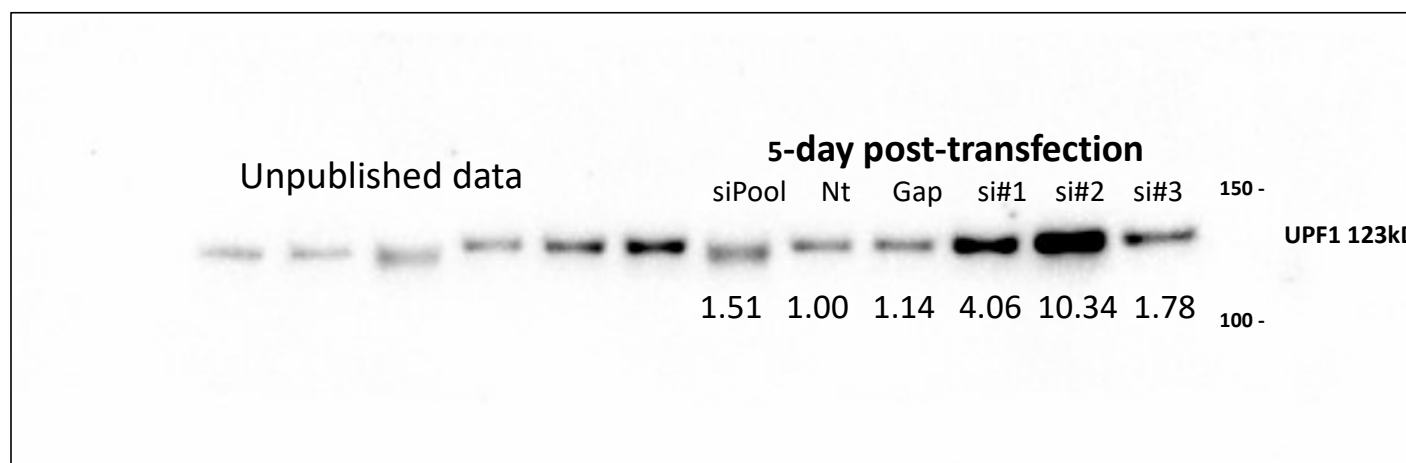

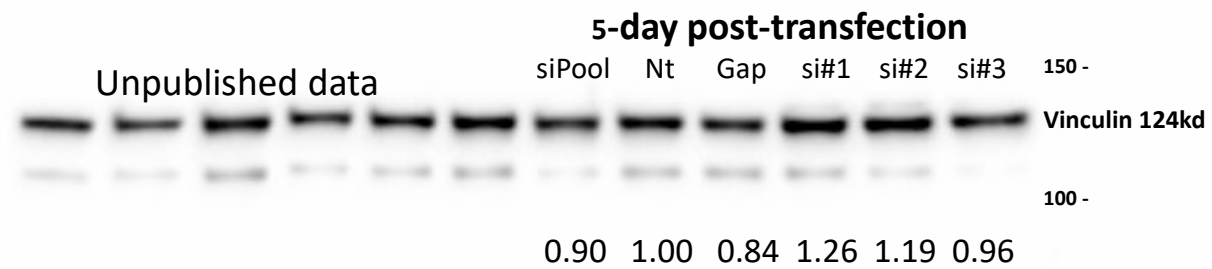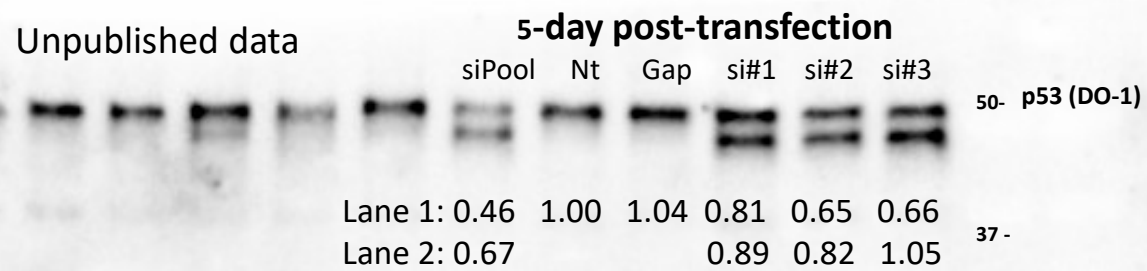

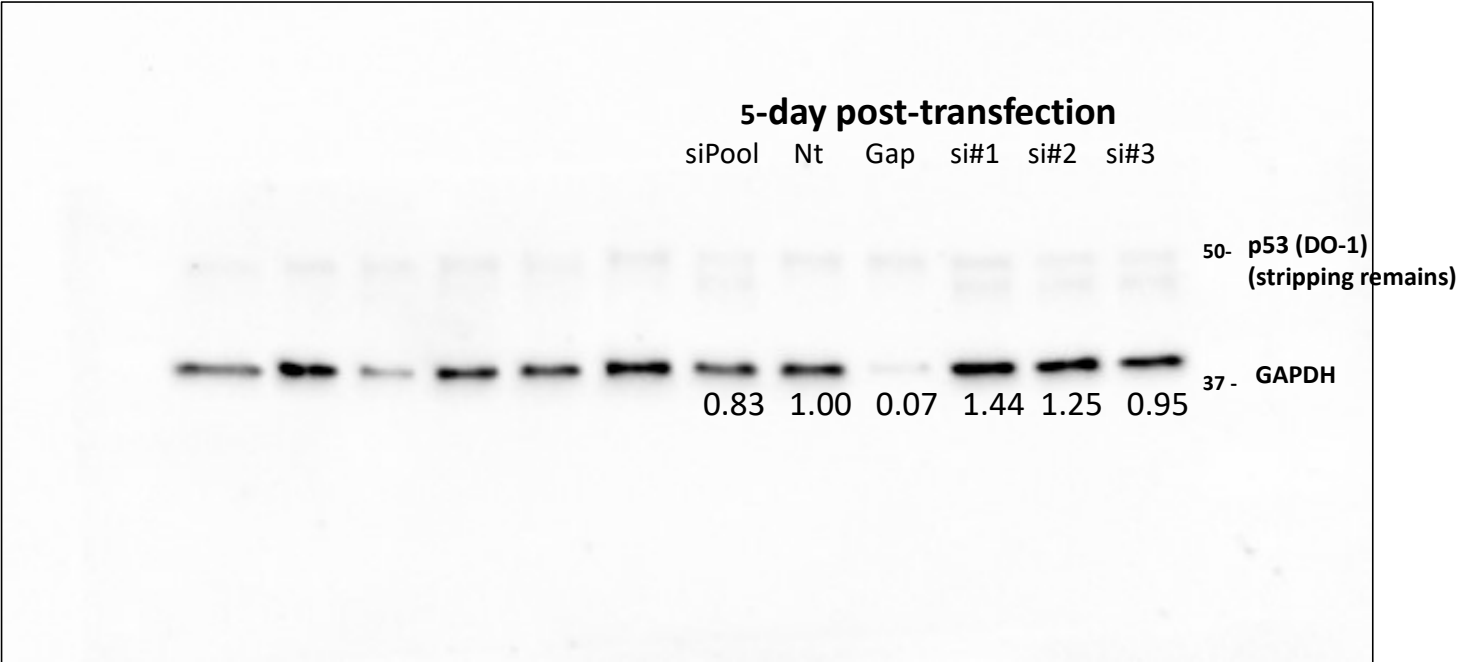



Figure. 2D

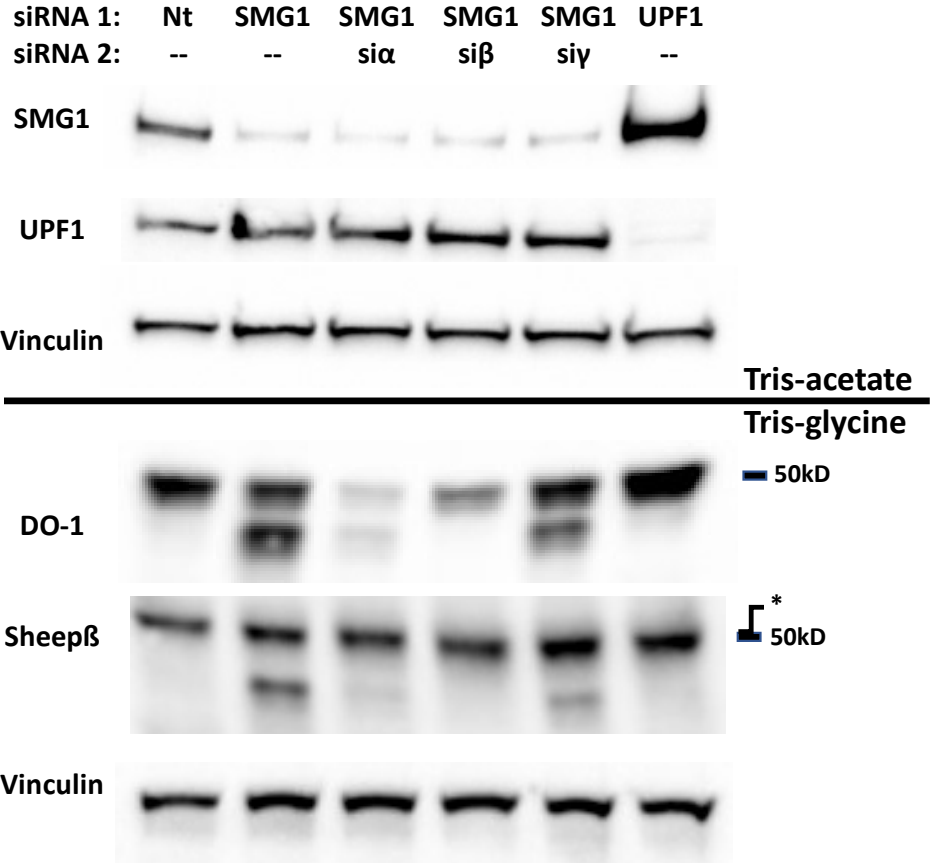

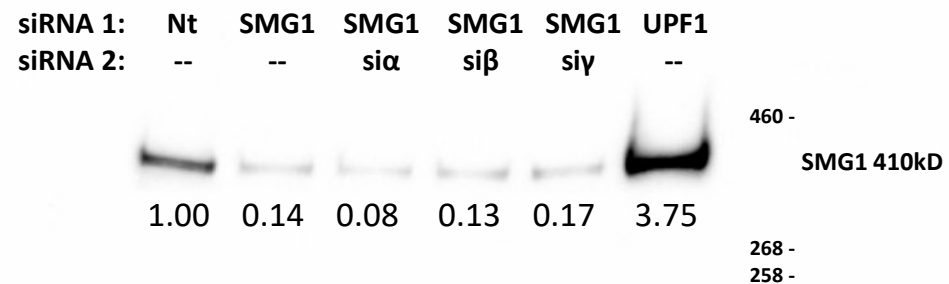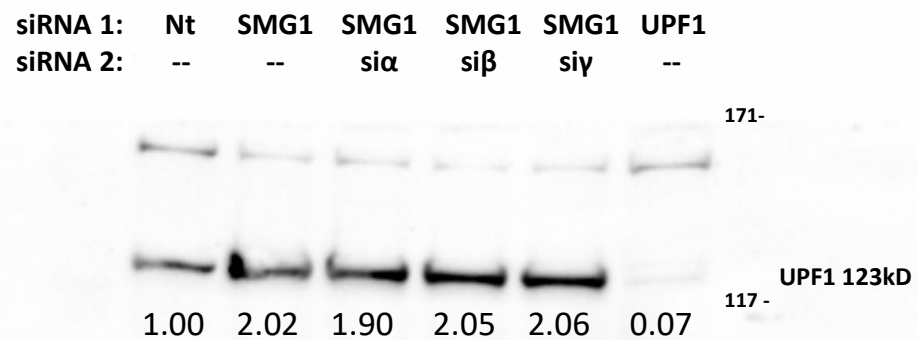

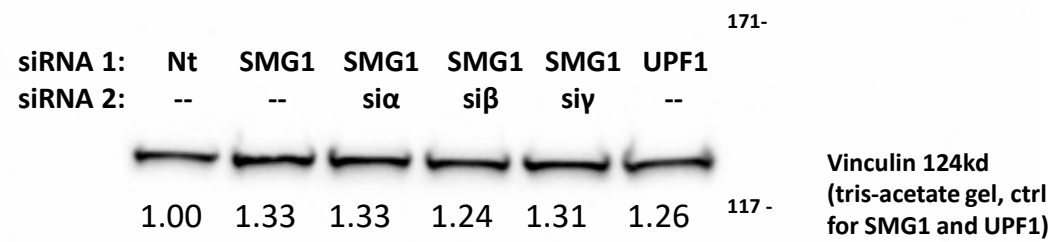

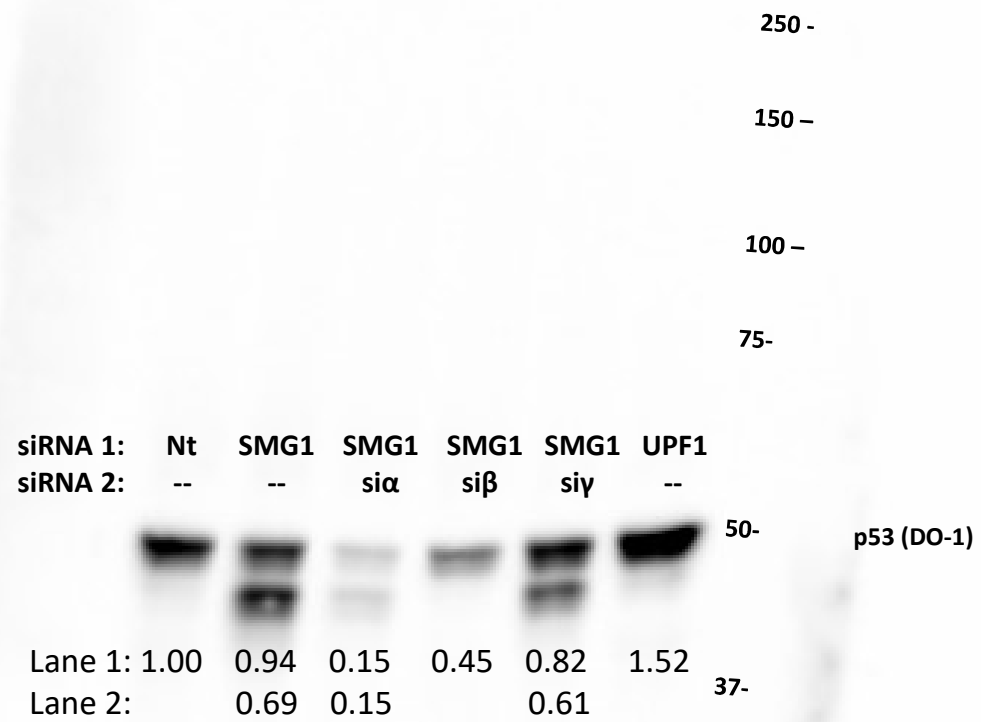

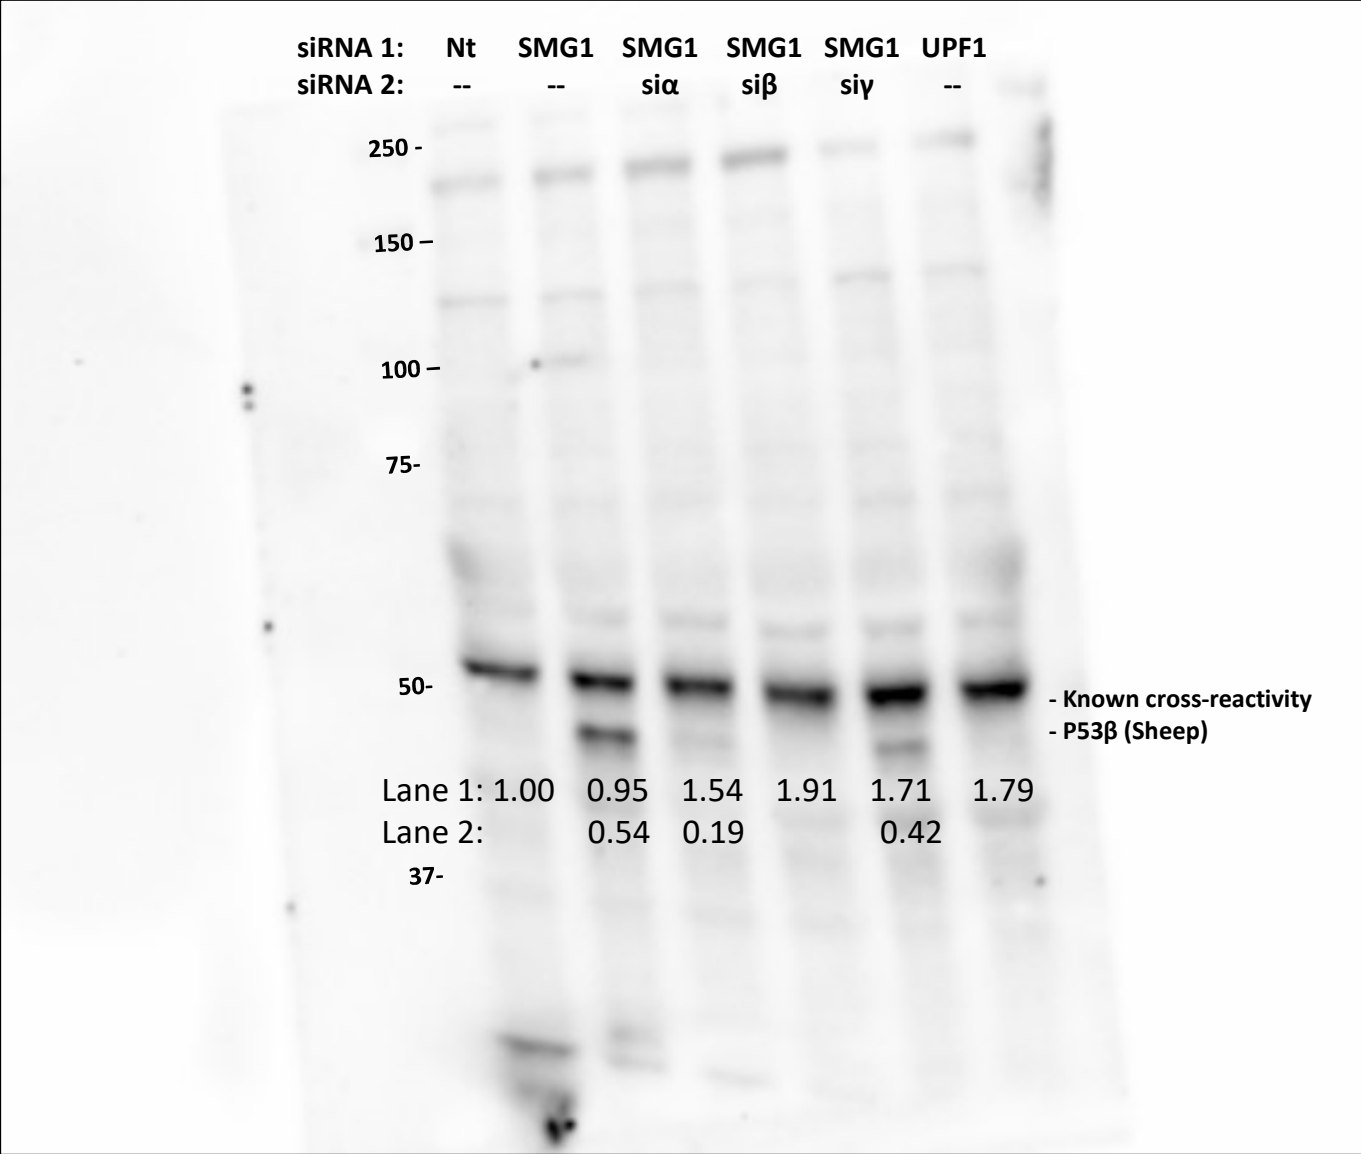

|          |    |      |             |            |             |      |
|----------|----|------|-------------|------------|-------------|------|
| siRNA 1: | Nt | SMG1 | SMG1        | SMG1       | SMG1        | UPF1 |
| siRNA 2: | -- | --   | si $\alpha$ | si $\beta$ | si $\gamma$ | --   |

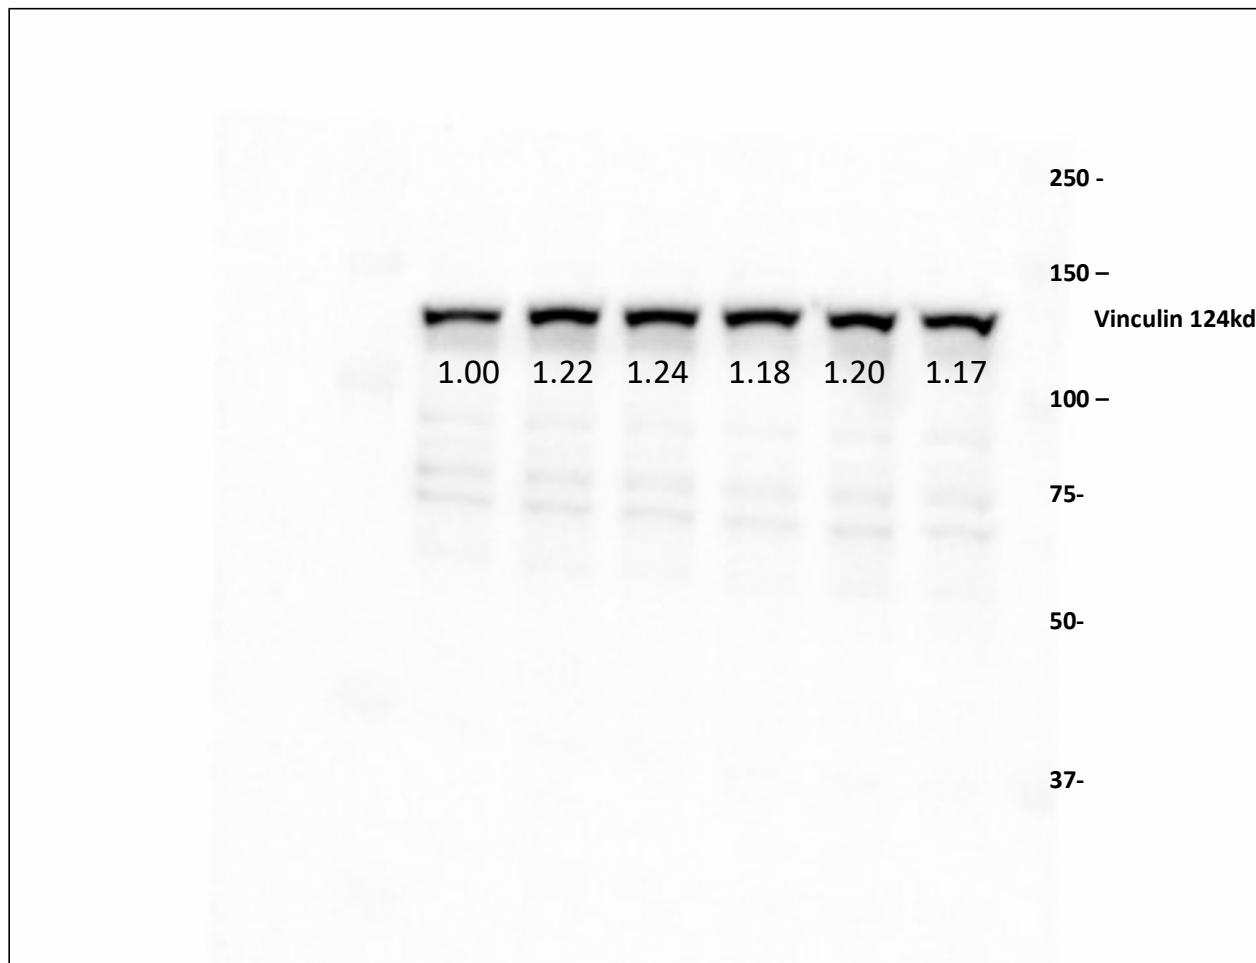

**Figure 3B.**

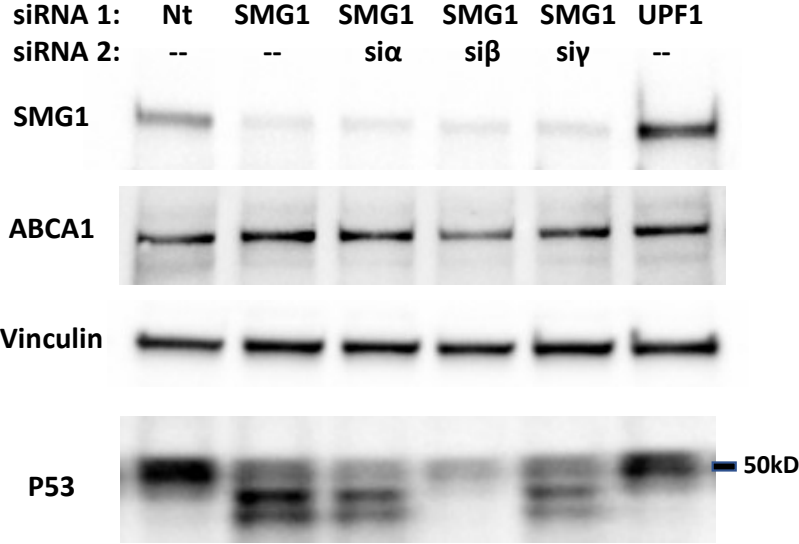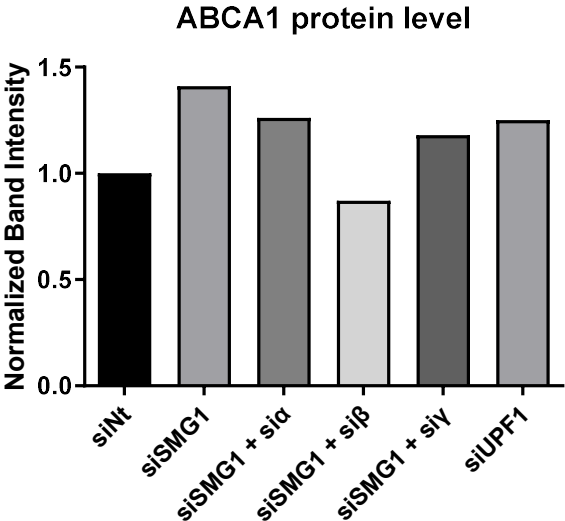

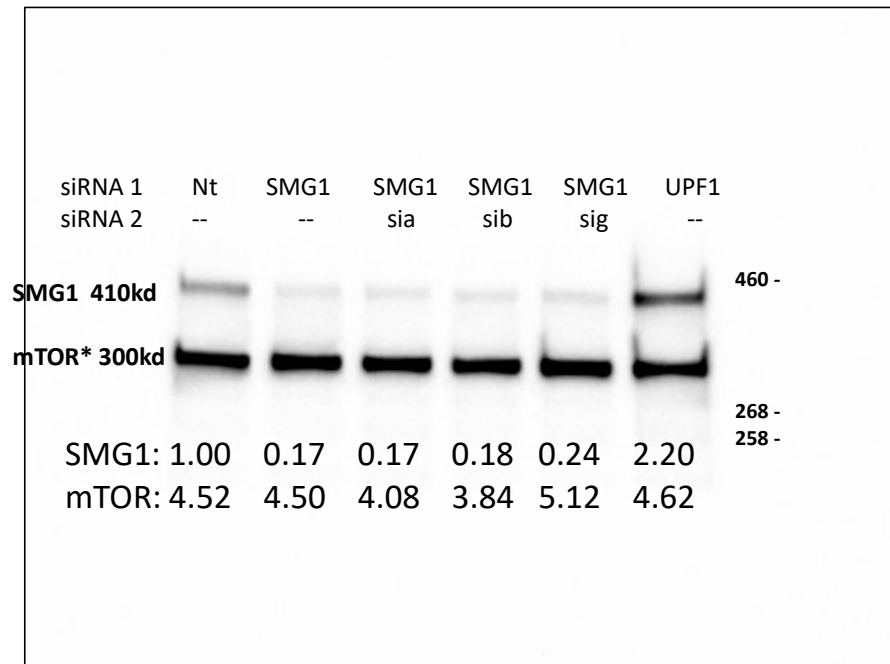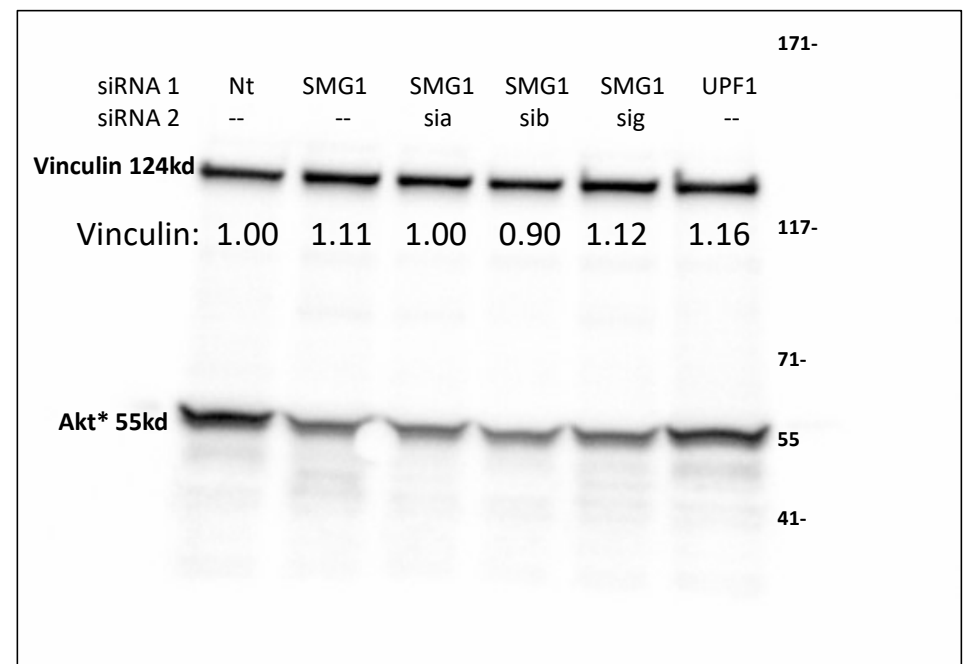

- mTOR and Akt were probed for explorational purpose but not described in the paper.
- High-quality Mouse Monoclonal antibodies that we have lots of experiences with are occasionally duplexed to save time and materials.



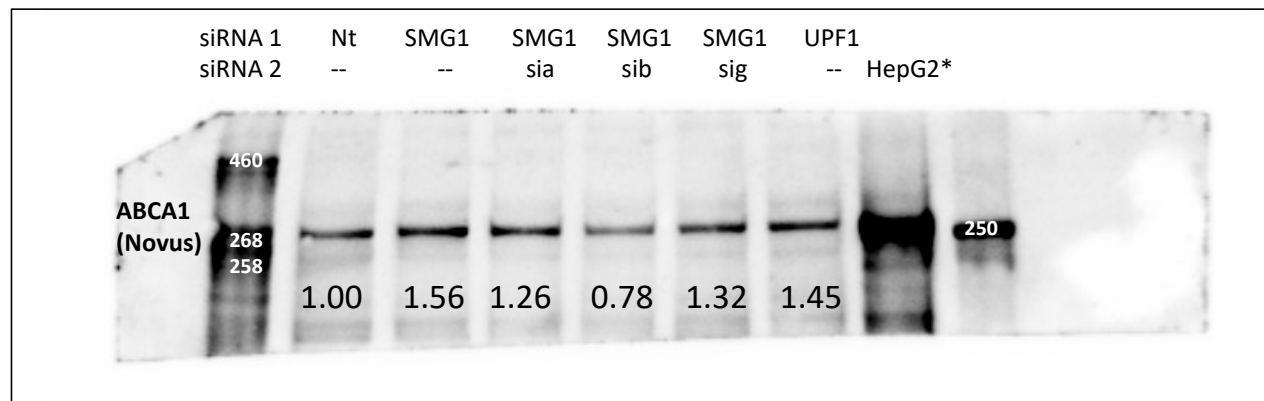

\* The HepG2 lane is cropped in the article. HepG2 is a liver cancer cell line that expresses a high level of cholesterol-related genes, making it an excellent ABCA1 antibody control.

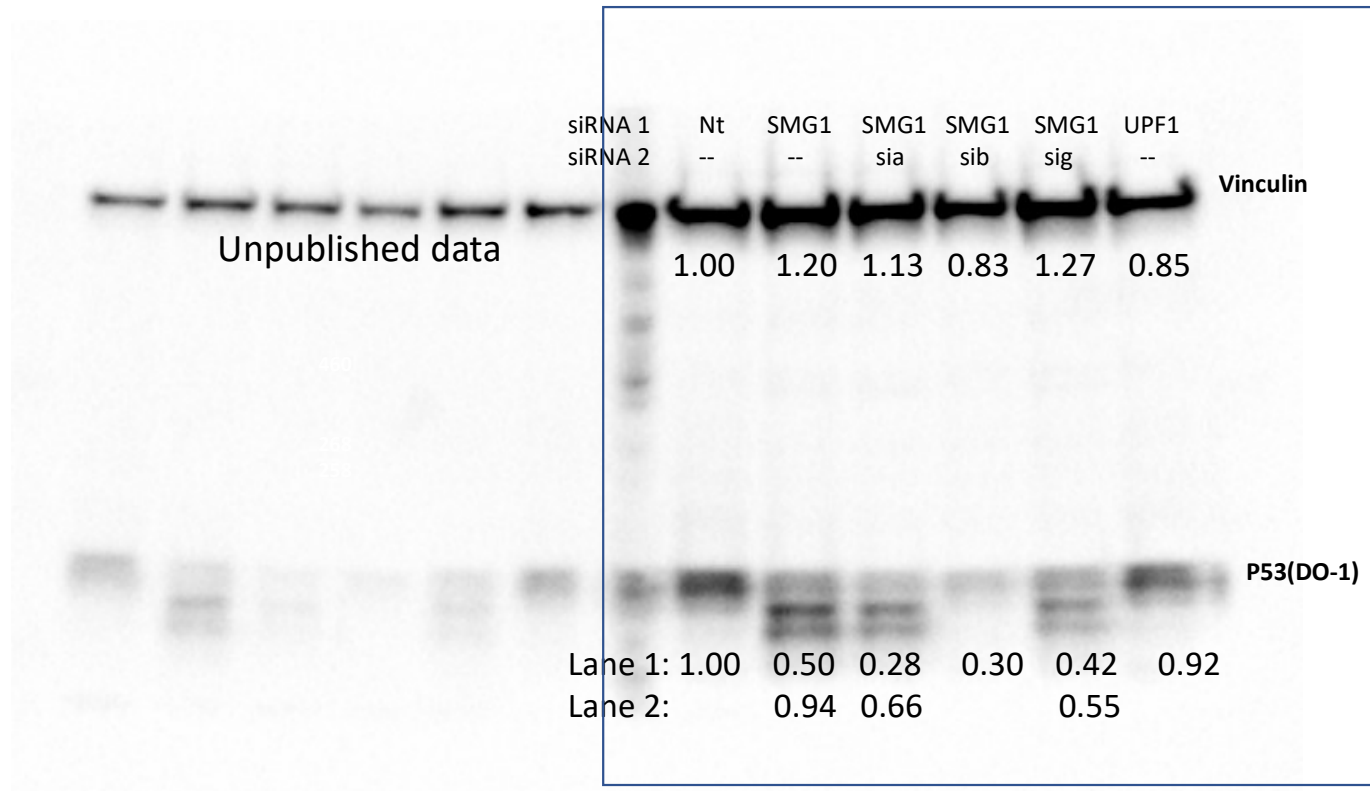

Figure. 4C

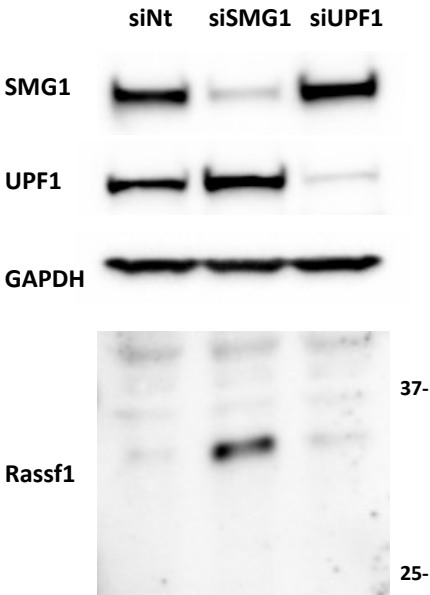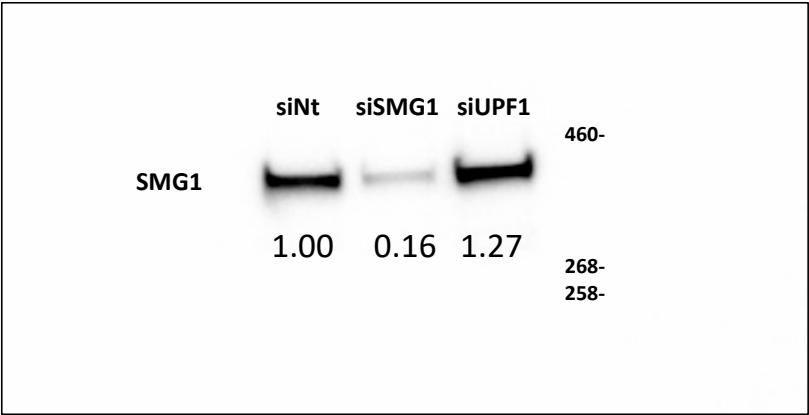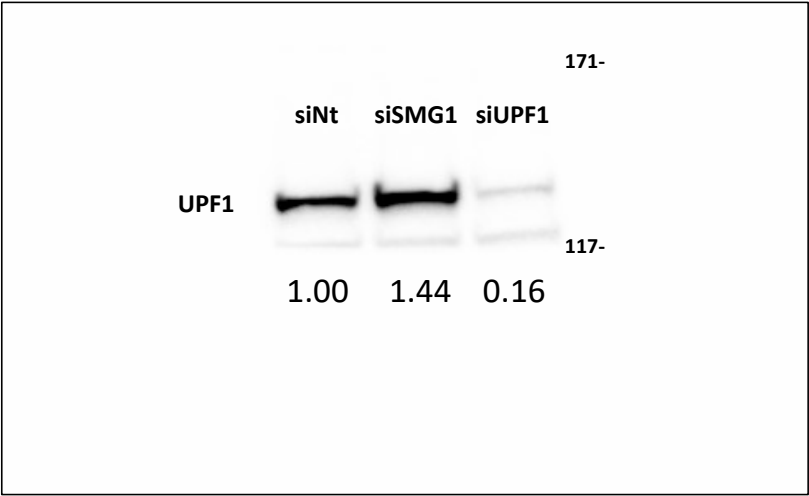

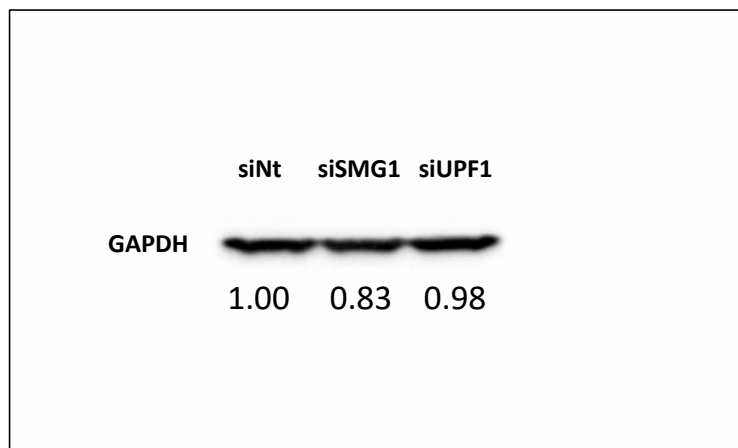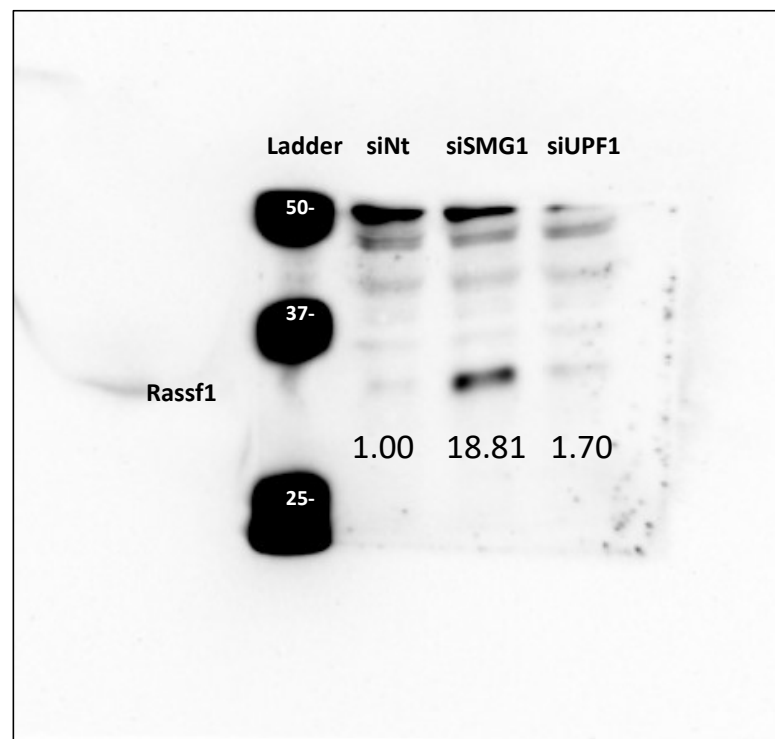

\* To more accurately locate rassf1 band considering it may have isoforms, we used Precision Plus Protein unstained standards and StrepTactin-HRP conjugate. This blot is 5-min exposure time, hence the ladder lane is overexposed.

Figure. S4

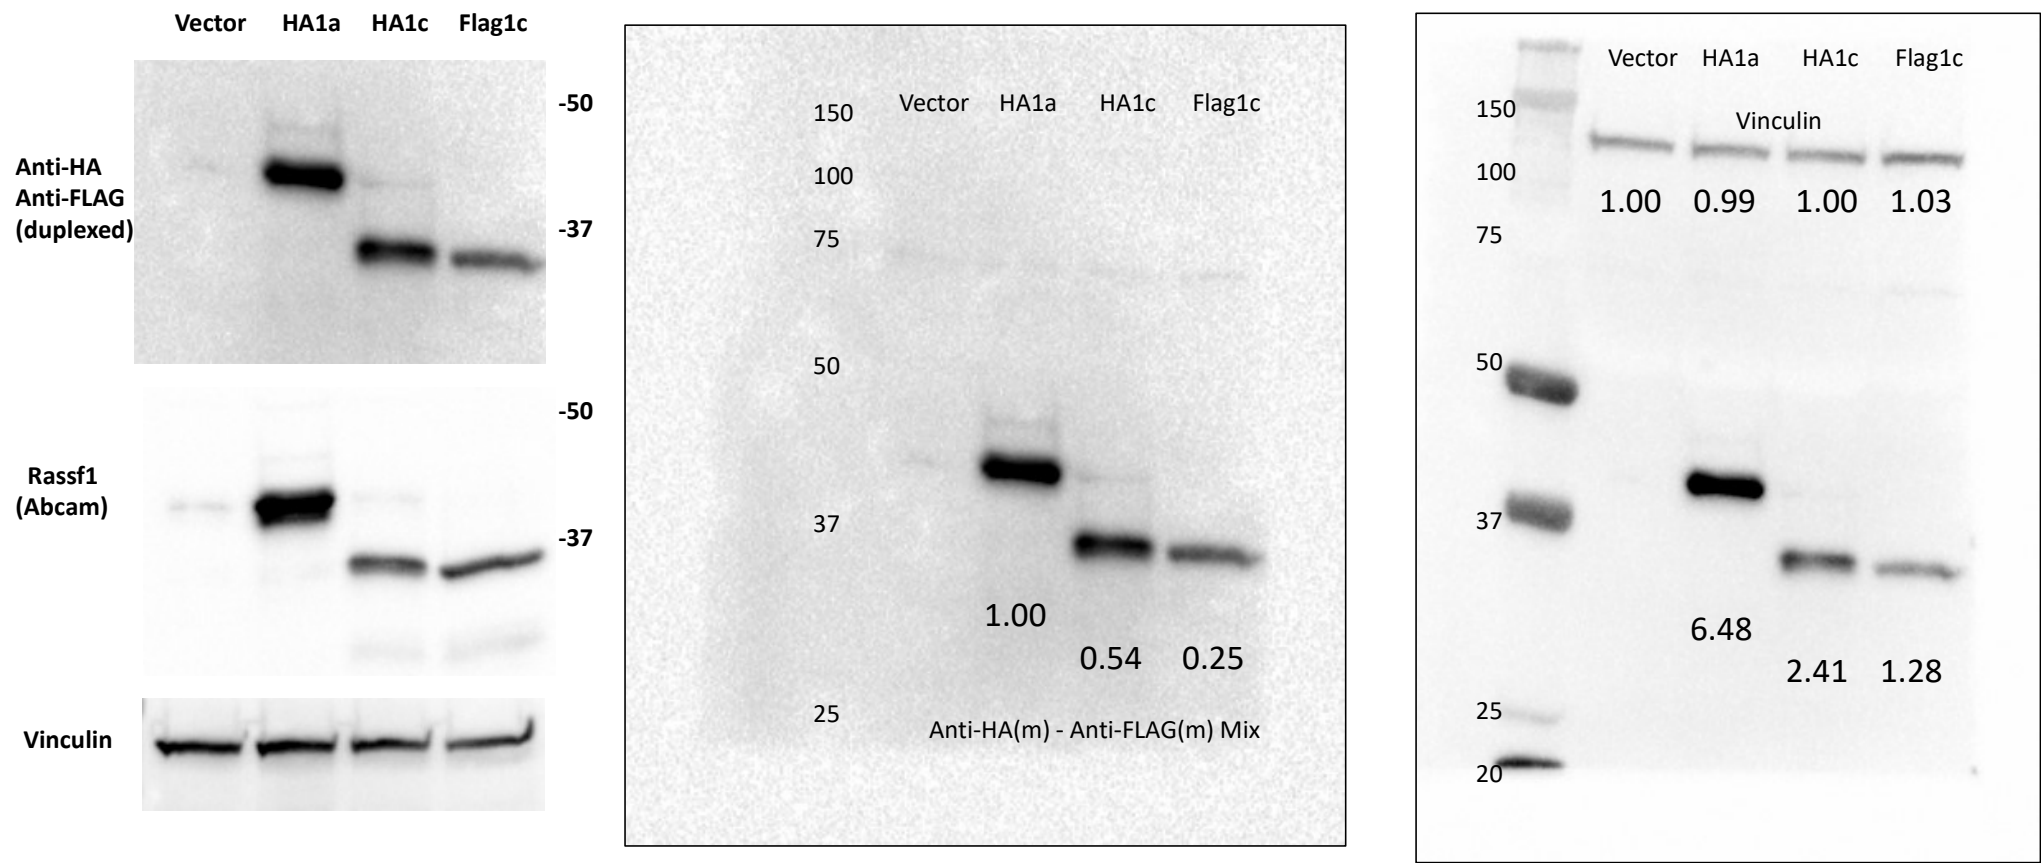

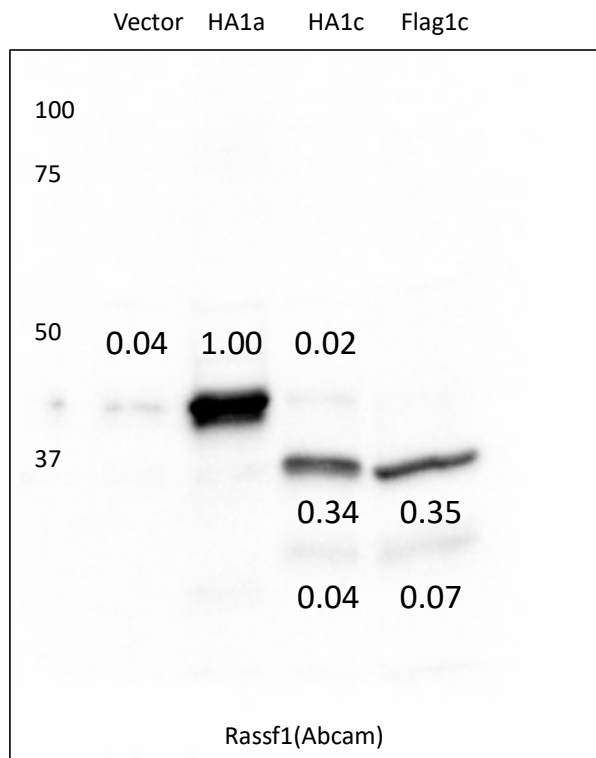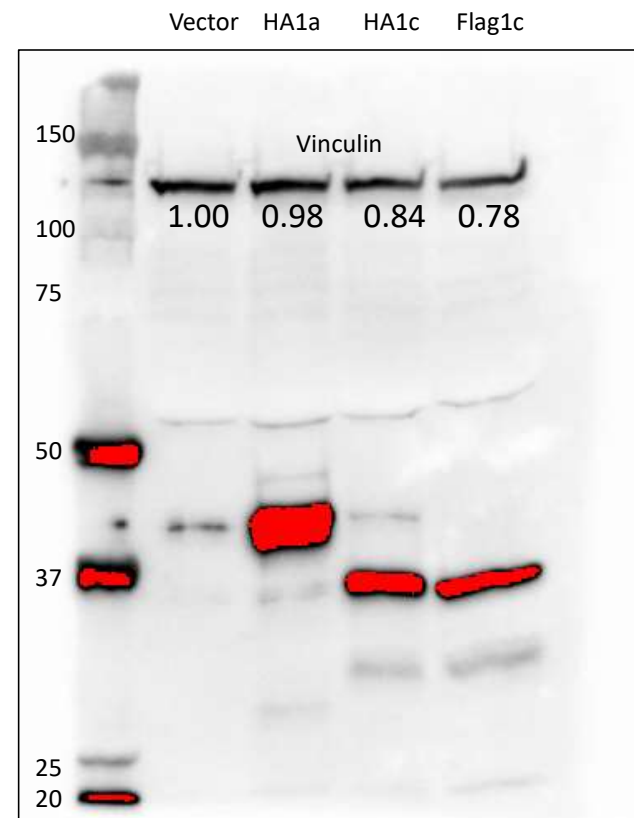

Supplement: s1 [file s1]
